# Supplementary material
Source: MDPI journal article supplement (https://www.mdpi.com/2313-433X/8/12/327)
Supplement: s1 [file s1]

**File S1.** Supplementary file detailing MRI acquisition methods.

MRI evaluations of the enrolled patients were performed either on the 1.5-T (Megatom Amira; Siemens Healthcare Systems, Erlangen, Germany) or a 3.0-T system (Ingenia, Achieva; Philips Medical Systems, Best, the Netherlands). Each MRI protocol for supratentorial meningioma encompasses four sequences: axial and sagittal T1-weighted images (T1WI), three-dimensional axial, sagittal, and coronal contrast-enhanced T1WI (3D CE-T1WI), axial T2-weighted image (T2WI), and axial T2-Fluid Attenuated Inversion recovery (FLAIR). In the 1.5-T scanner, axial T1WI was obtained with a repetition time/echo time (TR/TE), 500/7.3 ms; flip angle (FA), 80°; acquisition matrix,  $320 \times 235 \text{ mm}^2$ ; slice thickness of 5 mm, and section spacing of 6 mm. Axial T2WI was obtained with a TR/TE of 3480/97 ms, FA of 160°, acquisition matrix of  $384 \times 327 \text{ mm}^2$ , slice thickness of 5 mm, and section spacing of 6 mm. Axial FLAIR images were obtained with a TR/TE of 8000/126 ms; FA, 150°; acquisition matrix,  $320 \times 232 \text{ mm}^2$ ; slice thickness, 5 mm; and section spacing, 6 mm. Sagittal 3D CE-T1WI was obtained with a TR/TE, 600/3.8 ms; FA, 120°; acquisition matrix,  $256 \times 256 \text{ mm}^2$ ; slice thickness of 1 mm, without section spacing. In the 3-T scanner, axial T1WI was obtained with a TR/TE, 600/7.3 ms; FA, 90°; acquisition matrix,  $256 \times 256 \text{ mm}^2$ ; slice thickness of 5 mm, and section spacing of 6 mm. Axial T2WI was obtained with a TR/TE of 3000/80 ms; FA, 90°; acquisition matrix,  $400 \times 294 \text{ mm}^2$ ; slice thickness, 5 mm; and section spacing, 6 mm. Axial FLAIR images were obtained with a TR/TE of 11000/125 ms; FA, 90°; acquisition matrix,  $240 \times 240 \text{ mm}^2$ ; slice thickness, 5 mm; and section spacing, 6 mm. Sagittal 3D CE-T1WI was obtained with a TR/TE, 10.46/6.91 ms; FA, 8°; acquisition matrix,  $240 \times 240 \text{ mm}^2$ ; slice thickness of 1 mm, without section spacing. The region of interest for meningiomas was generated by two radiologists (S.J.C. and B.S.C., with 7 and 20 years of experience in neuroradiology, respectively).

**Table S1.** Table of enrolled subjects' characteristics

|             |        | Patients (n=91) | Normal (n = 12) | Total (n= 103) |
|-------------|--------|-----------------|-----------------|----------------|
| Sex         | Female | 66              | 5               | 71             |
|             | Male   | 25              | 7               | 32             |
| Age (years) | Mean   | 60.1            | 56.9            | 58.5           |
|             | Range  | [19,92]         | [32, 80]        | [19,92]        |

**Table S2.** Table of enrolled subjects' meningioma characteristics

|                          |                   | Numbers | Percentage (%) |
|--------------------------|-------------------|---------|----------------|
| Localization             | Convexity         | 48      | 53             |
|                          | Parasagittal      | 10      | 11             |
|                          | Falx              | 10      | 11             |
|                          | Sphenoid wing     | 10      | 11             |
|                          | Tentorial         | 6       | 7              |
|                          | Olfactory groove  | 3       | 3              |
|                          | Tuberculum sellae | 2       | 2              |
|                          | Clinoidal         | 1       | 1              |
|                          | Intraventricular  | 1       | 1              |
|                          | -                 | -       | -              |
| Attachment to Skull Base | -                 | -       | -              |
|                          | Yes               | 22      | 24             |
|                          | Total             | 91      | 100            |

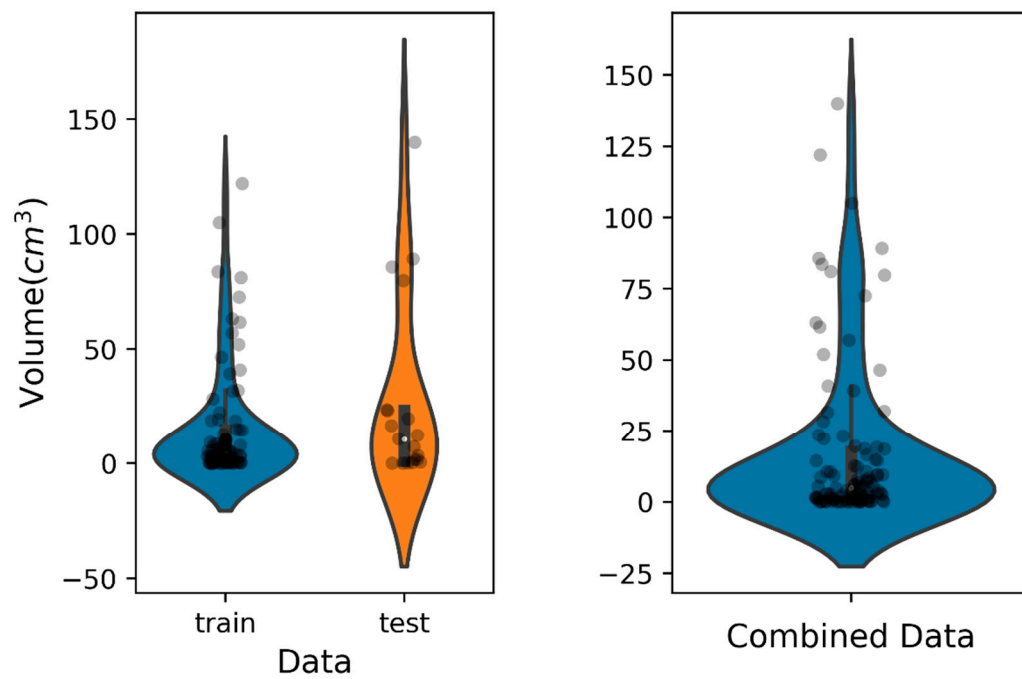

**Figure S1. Violin Plots of whole tumor volume.** The dataset is grouped as train/test (left panel) and combined (right panel).

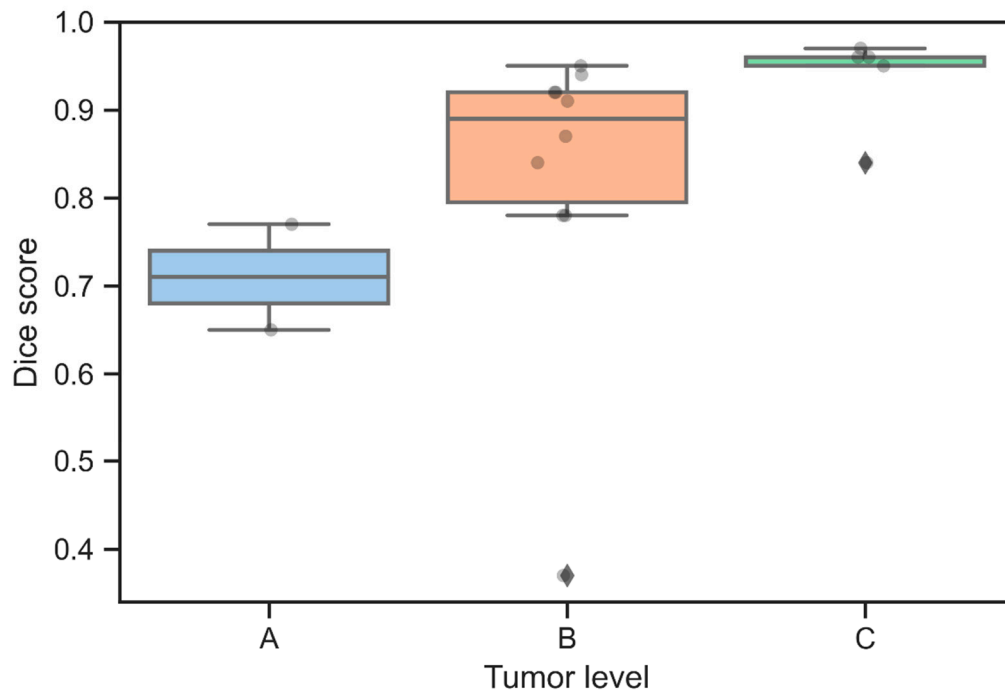

| Tumor Level | Size Range (cm <sup>3</sup> ) |
|-------------|-------------------------------|
| A           | 0 - 0.4                       |
| B           | 0.4 - 23.355                  |
| C           | 23.355 - 139.87               |

**Figure S2. Dice score plots against binned whole tumour size.** Binning of whole tumor size has been done with alphabetically ascending order so that performance (i.e. Dice score) on the test set can be compared across size.
